# Supplementary material
Source: PubMed Central journal article supplement (PMC3461930)
Supplement: JCI64906sd.pdf [file JCI64906sd.pdf]

**A**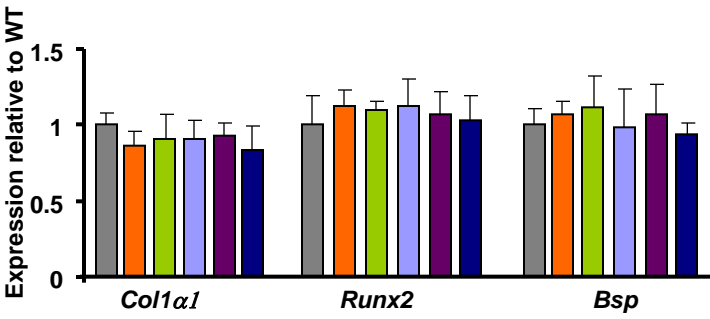**B**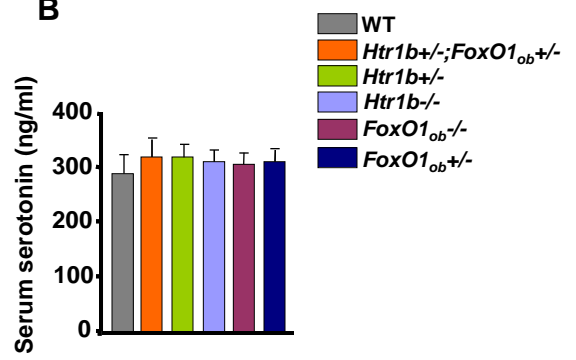

**Supplemental Figure 1: Htr1b and FoxO1 interaction does not affect expression of osteoblast differentiation genes. (A)** *Col1α1*, *Runx2* and *BSP* expression in bones of 2 month-old mice, n=4 mice/group. \*p < 0.05 versus WT and #p < 0.05 versus *Htr1b<sup>+/-</sup>;FoxO1<sub>ob</sub><sup>+/-</sup>* group. **(B)** Serum serotonin levels. n=4 mice/group.

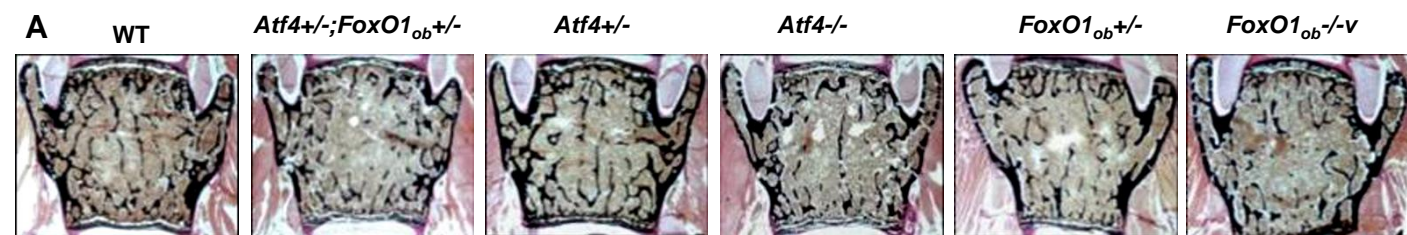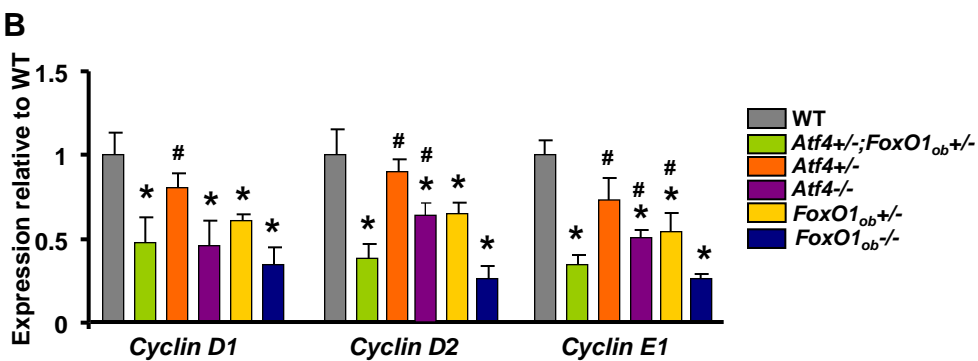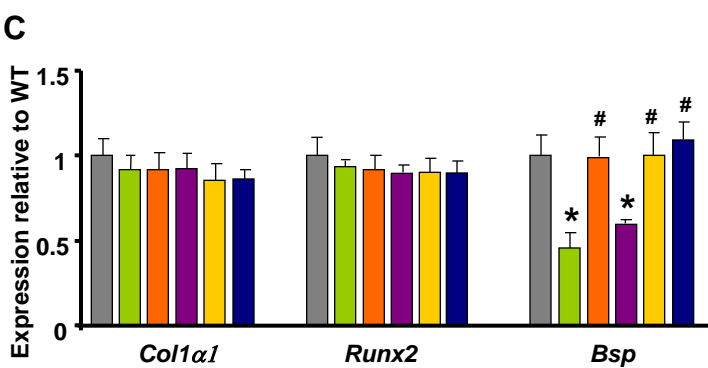

**Supplemental Figure 2: FoxO1 and ATF4 synergize to maintain osteoblast proliferation.** (A) Representative vertebral section images from 2 month-old mice. Mineralized bone matrix is stained in black by Von Kossa reagent. Images at 4x. (B-C) Real-time PCR analysis of indicated genes in bones, n=4 mice/group. \*p < 0.05 versus WT and #p < 0.05 versus *Atf4*<sup>+/-</sup>;*FoxO1*<sub>ob</sub><sup>+/-</sup> group. Mice were 2 months old.

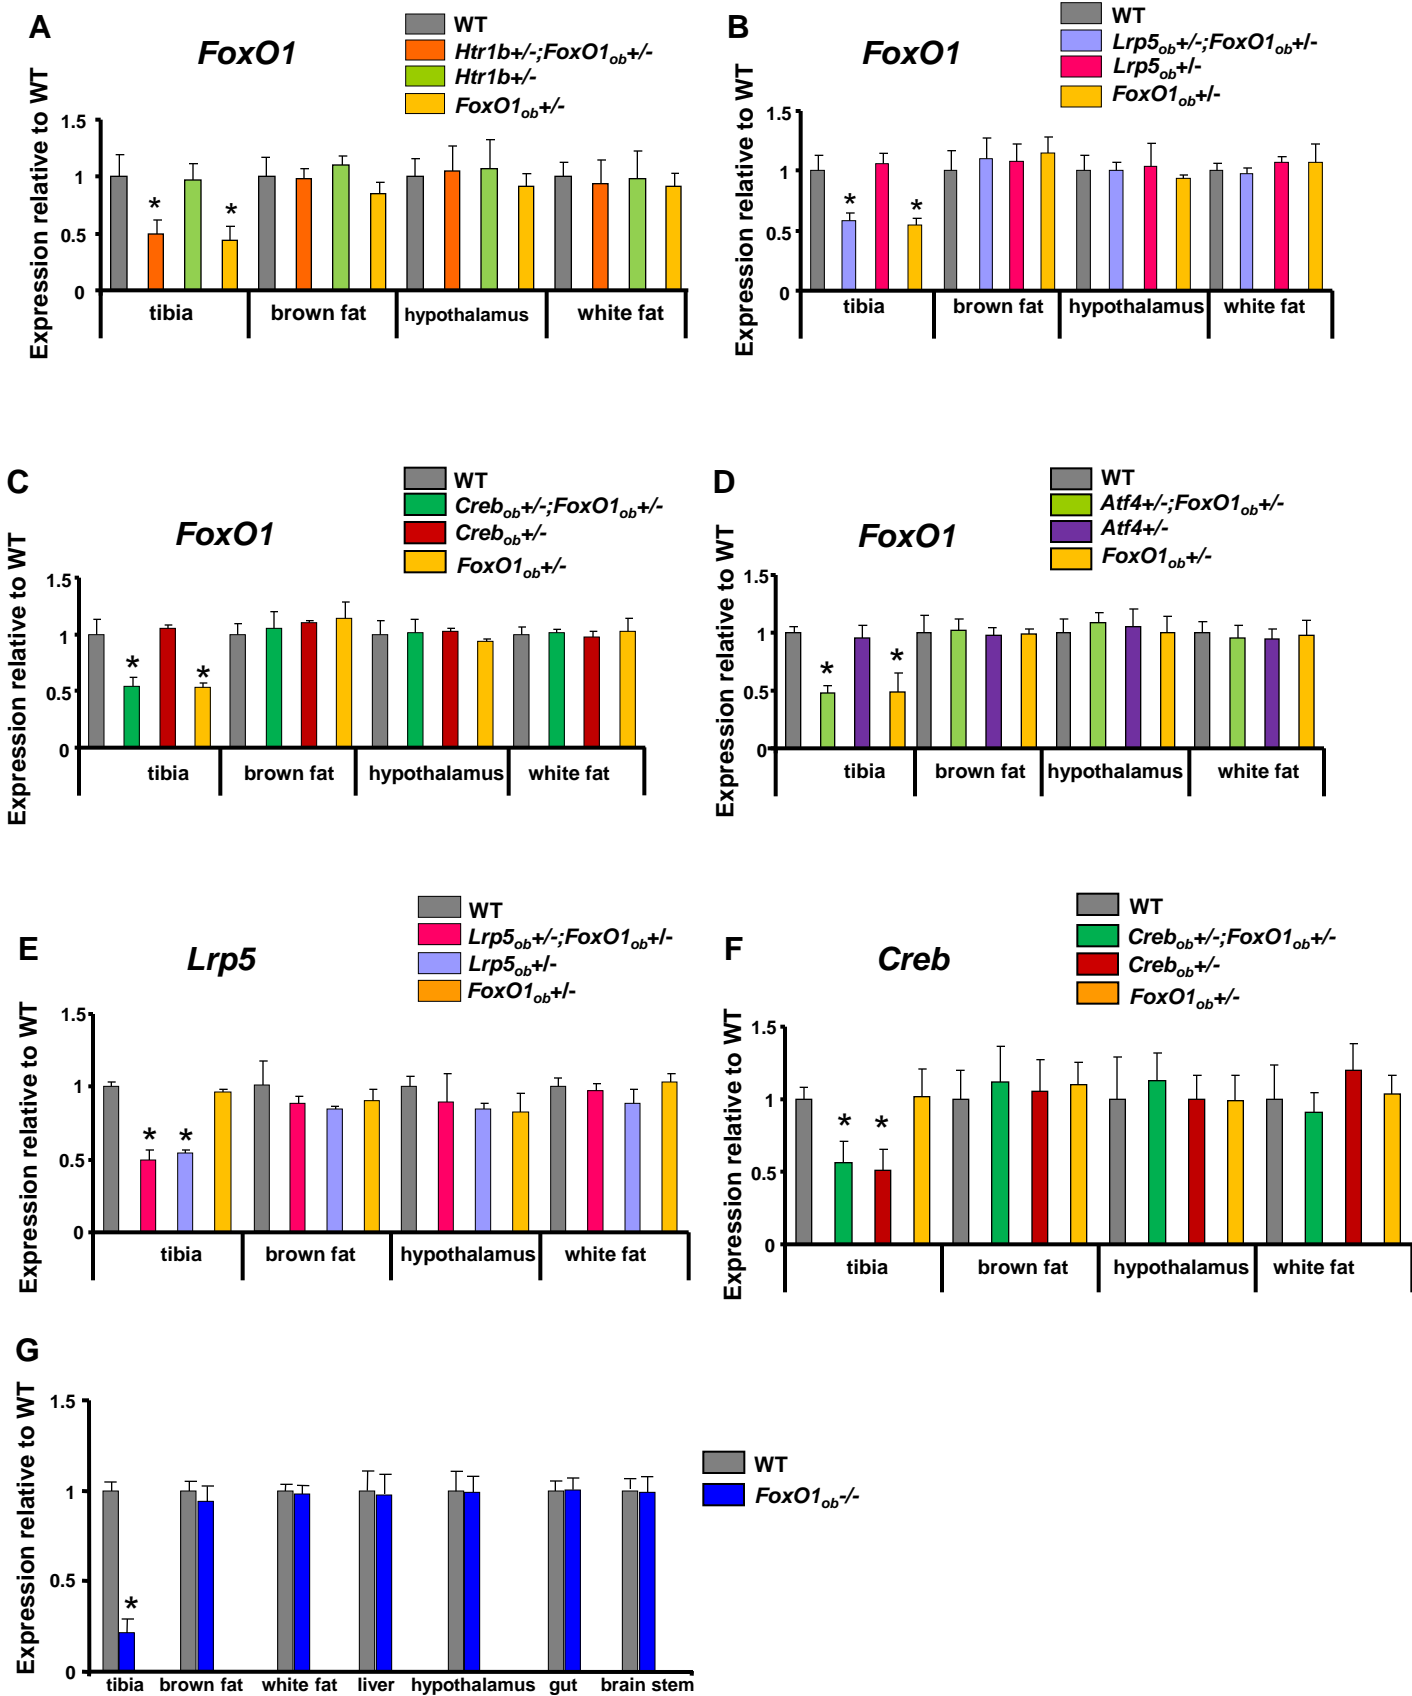

**Supplemental Figure 3: Osteoblast-specific inactivation of *FoxO1*, *Lrp5*, and *Creb* in mice (A-D and G) *FoxO1*, (E) *Lrp5* and (F) *Creb* expression in tissues of WT and indicated mouse models, n=4 mice/group. \*p < 0.05 versus WT.**

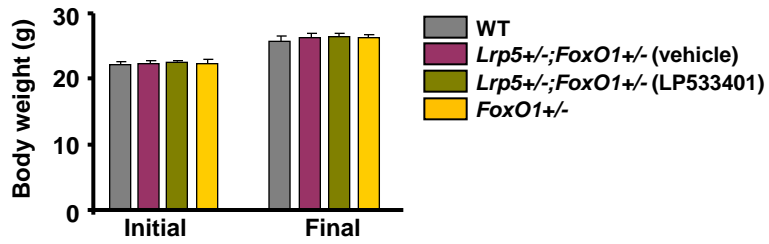

**Supplemental Figure 4: Normal body weight in mice treated with the gut serotonin synthesis inhibitor.** The gut-derived serotonin synthesis inhibitor LP533401 was administered at 200mg/kg/day by oral gavage for 4 weeks. n=6 mice/group.. Mice were 2 months old.

**Supplemental Table 1: FoxO1-ATF4 interaction is required for osteoblast proliferation.**

|                                               | Wild type |      | <i>Atf4</i> <sup>+/-</sup> ;<br><i>FoxO1</i> <sub>ob</sub> <sup>+/-</sup> |      | <i>Atf4</i> <sup>+/-</sup> |       | <i>Atf4</i> <sup>-/-</sup> |       | <i>FoxO1</i> <sub>ob</sub> <sup>+/-</sup> |        | <i>FoxO1</i> <sub>ob</sub> <sup>-/-</sup> |       |
|-----------------------------------------------|-----------|------|---------------------------------------------------------------------------|------|----------------------------|-------|----------------------------|-------|-------------------------------------------|--------|-------------------------------------------|-------|
| <b>BV/TV (%)</b>                              | 15.09     | 0.9  | 9.85                                                                      | 1.2* | 13.31                      | 0.5*# | 10.75                      | 1.3*# | 12.95                                     | 0.6*#  | 9.13                                      | 1.4*  |
| <b>N.Ob/T.Ar(/mm)</b>                         | 95.12     | 10.3 | 41.26                                                                     | 7.6* | 87.31                      | 6.5#  | 51.56                      | 8.3*  | 71.32                                     | 11.6*# | 39.47                                     | 5.1*  |
| <b>BFR (μm<sup>3</sup>/μm<sup>2</sup>/yr)</b> | 150.32    | 18.5 | 53.41                                                                     | 8.7* | 138.65                     | 10.3# | 73.48                      | 9.7*# | 83.49                                     | 9.8*#  | 51.38                                     | 6.9*  |
| <b>OcS/BS</b>                                 | 9.56      | 1.4  | 10.24                                                                     | 1.2  | 9.36                       | 1.5   | 9.11                       | 0.1   | 10.57                                     | 0.9    | 18.16                                     | 2.3*# |

Histomorphometric analysis of vertebrae of WT, *Atf4*<sup>+/-</sup>; *FoxO1*<sub>ob</sub><sup>+/-</sup>, *Atf4*<sup>+/-</sup>, *Atf4*<sup>-/-</sup>, *FoxO1*<sub>ob</sub><sup>+/-</sup>, and *FoxO1*<sub>ob</sub><sup>-/-</sup> mice. BV/TV, bone volume over trabecular volume; N.Ob/T.Ar, number of osteoblasts per trabecular area; BFR, Bone Formation Rate, OcS/BS, osteoclast surface per bone surface. WT, *Atf4*<sup>+/-</sup>, *Atf4*<sup>-/-</sup>, *Atf4*<sup>+/-</sup>;*FoxO1*<sub>ob</sub><sup>+/-</sup>, *FoxO1*<sub>ob</sub><sup>+/-</sup>, *FoxO1*<sub>ob</sub><sup>-/-</sup>. (n=6-10 mice/group). \*p < 0.05 versus wild type, #p < 0.05 versus *Atf4*<sup>+/-</sup>;*FoxO1*<sub>ob</sub><sup>+/-</sup> group and \$p < 0.001 versus *ATF4*<sup>+/-</sup>; and *FoxO1*<sub>ob</sub><sup>+/-</sup> as determined by a test of multiplicative model in an One Way Anova. Mice were 2 months old.

**Supplemental Table 2: Primer sequences used in real-Time PCR.**

| <b>Primer</b>                   | <b>Forward primer 5'-&gt;3'</b>   | <b>Reverse primer 5'-&gt;3'</b>  |
|---------------------------------|-----------------------------------|----------------------------------|
| <b><i>β-Actin</i></b>           | <b>5'GACCTCTATGCCAACACAGT 3'</b>  | <b>5' AGTACTTGCGCTCAGGAGGA3'</b> |
| <b><i>BSP</i></b>               | <b>5'GGGAGGCAGTGA CTCTTCAG 3'</b> | <b>5'CCCGAGAGTGTGGAAAGTGT3'</b>  |
| <b><i>Col1a1</i></b>            | <b>5'GAGAGCATGACCGATGGATT 3'</b>  | <b>5' TGAGCTCGATCTCGTTGGAT3'</b> |
| <b><i>Cyclin D1</i></b>         | <b>5' AGTGCGTGCAGAAGGAGATT3'</b>  | <b>5'CACA ACTTCTCGGCAGTCAA3'</b> |
| <b><i>Cyclin D2</i></b>         | <b>5'TCCCGCAGTGTTCTATTTC3'</b>    | <b>5' CCAAGAAACGGTCCAGGTAA3'</b> |
| <b><i>Cyclin E1</i></b>         | <b>5'CCTCCAAAGTTGCACCAGTT3'</b>   | <b>5'CACCCGTGTCGTTGACATAG3'</b>  |
| <b><i>Runx2</i></b>             | <b>5' GCCGGGAATGATGAGAACTA3'</b>  | <b>5' GGACCGTCCACTGTCACTTT3'</b> |
| <b><i>Sod2</i></b>              | <b>5'CCGAGGAGAAGTACCACGAG3'</b>   | <b>5'GCTTGATAGCCTCCAGCAAC3'</b>  |
| <b><i>p19<sup>ARF</sup></i></b> | <b>5'CCACCCTTACCAGACCTGTG3'</b>   | <b>5'AGGCGTCACACACATCCAG3'</b>   |
| <b><i>p16</i></b>               | <b>5'TCAACTACGGTGCAGATTCG3'</b>   | <b>5'TCGCACGATGTCTTGATGTC3'</b>  |
| <b><i>Catalase</i></b>          | <b>5'CCTGACATGGTCTGGACTT3'</b>    | <b>5'CAAGTTTTTGTATGCCCTGGT3'</b> |
| <b><i>Gadd45</i></b>            | <b>5'TGAGCTGCTGCTACTGGAGA3'</b>   | <b>5'TCCCGGCAAAAACAAATAAG3'</b>  |
